# Supplementary material for: Mechanism of cellular accumulation of an iridium(iii) pentamethylcyclopentadienyl anticancer complex containing a C,N-chelating ligand
Source: Royal Society of Chemistry journal article supplement (doi:10.1039/c3mt00341h), 2014-01-01
Supplement: c3mt00341h.pdf [file c3mt00341h.pdf]

## Supplementary Information

### **Mechanism of cellular accumulation of an iridium(III) pentamethylcyclopentadienyl anticancer complex containing a C,N-chelating ligand**

Vojtech Novohradsky,<sup>a,c</sup> Zhe Liu,<sup>b</sup> Marie Vojtiskova,<sup>c</sup> Peter J. Sadler,<sup>b</sup> Viktor Brabec,<sup>a</sup> Jana Kasparkova<sup>\*,c</sup>

<sup>a</sup> *Department of Biophysics, Faculty of Science, Palacky University, 17. listopadu 12, CZ-77146 Olomouc, Czech Republic.*

<sup>b</sup> *Department of Chemistry, University of Warwick, Gibbet Hill Road, Coventry CV4 7AL, United Kingdom*

<sup>c</sup> *Institute of Biophysics, Academy of Sciences of the Czech Republic, v.v.i., Kralovopolska 135, CZ-61265 Brno, Czech Republic*

\*To whom correspondence should be addressed: jana@ibp.cz

Figure S1

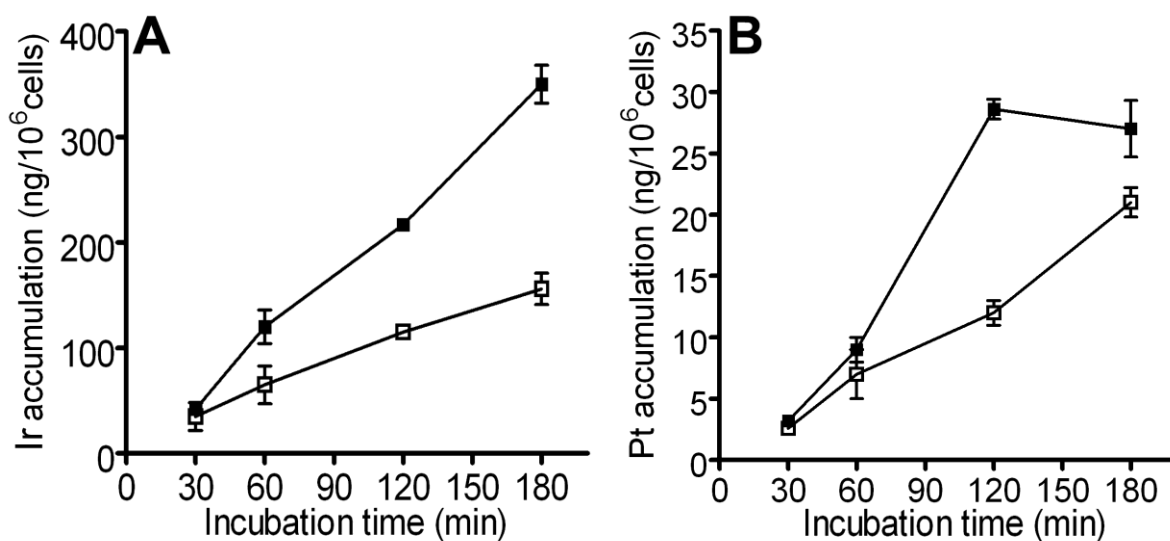

Fig. S1: Time dependence of accumulation of Ir from complex **1** (A) or Pt from cisplatin (B) in A2780 cells. Symbols: open squares, accumulation after incubation with complex **1** (30  $\mu$ M) or cisplatin (30  $\mu$ M) alone; filled squares, accumulation after 1 h pre-incubation of the cells with 2-deoxy-D-glucose (50 mM) plus oligomycin (5  $\mu$ M) and subsequent incubation with complex **1** (30  $\mu$ M) or cisplatin (30  $\mu$ M). The values represent mean  $\pm$  standard deviations for three independent samples.
